# Supplementary material for: Trifecta achievement in patients undergoing partial nephrectomy: a systematic review and meta-analysis of predictive factors
Source: PubMed Central journal article supplement (PMC9306373; doi:10.1590/s1677-5538.ibju.2021.0095), 2021-04-20
Supplement: 1677-6119-ibju-48-04-0625-suppl01.pdf [file 1677-6119-ibju-48-04-0625-suppl01.pdf]

## APPENDIX 1

Table S1 - Risk of bias for each included study.

| Study                   | Year | Selection                            |                         |                           | Comparability | Outcome                      |                       |                           | Overall |
|-------------------------|------|--------------------------------------|-------------------------|---------------------------|---------------|------------------------------|-----------------------|---------------------------|---------|
|                         |      | Representativeness of exposed cohort | Selection of nonexposed | Ascertainment of exposure |               | Outcome not present at start | Assessment of outcome | Adequate follow-up length |         |
| Furukawa et al. (22)    | 2020 | 1                                    | 1                       | 1                         | 1             | 1                            | 1                     | 1                         | 8       |
| Takeda et al. (23)      | 2020 | 0                                    | 1                       | 1                         | 1             | 0                            | 1                     | 1                         | 6       |
| Peyronnet et al. (16)   | 2018 | 1                                    | 1                       | 1                         | 1             | 1                            | 1                     | 1                         | 8       |
| Khene et al. (17)       | 2018 | 1                                    | 1                       | 1                         | 1             | 1                            | 1                     | 1                         | 8       |
| Harke et al. (18)       | 2018 | 1                                    | 1                       | 1                         | 1             | 1                            | 1                     | 1                         | 8       |
| Castellucci et al. (19) | 2018 | 0                                    | 1                       | 1                         | 1             | 1                            | 1                     | 1                         | 7       |
| Paulucci et al. (24)    | 2017 | 1                                    | 1                       | 1                         | 1             | 0                            | 1                     | 1                         | 7       |
| Lebentrau et al. (25)   | 2017 | 0                                    | 1                       | 1                         | 1             | 1                            | 1                     | 1                         | 7       |
| Porpiglia et al. (26)   | 2016 | 1                                    | 1                       | 1                         | 1             | 1                            | 1                     | 1                         | 8       |
| Kim et al. (27)         | 2016 | 0                                    | 1                       | 1                         | 1             | 1                            | 1                     | 1                         | 7       |
| Zargar et al. (20)      | 2015 | 1                                    | 1                       | 1                         | 1             | 1                            | 1                     | 1                         | 8       |
| Osaka et al. (28)       | 2015 | 0                                    | 1                       | 1                         | 1             | 1                            | 1                     | 1                         | 7       |
| Minervini et al. (29)   | 2014 | 1                                    | 1                       | 1                         | 1             | 1                            | 1                     | 1                         | 8       |
